# Supplementary material for: Polymorphisms in the CD28/CTLA4/ICOS genes: role in malignant melanoma susceptibility and prognosis?
Source: Springer Nature journal article supplement (doi:10.1007/s00262-009-0751-2), 2009-08-11
Supplement: MOESM1 [file 8230942]

Supplementary Table.

| SNP ID               | Region type      | Position on Gene | SNP | Forward primer        | Reverse primer          | Taq Man assay |
|----------------------|------------------|------------------|-----|-----------------------|-------------------------|---------------|
| rs3181098            | CD28 promotor    | -1042            | G/A | tgagacaccaaggggctttt  | ataggatggggacagggttg    | C_27467172_10 |
| rs3181100            | CD28 intron 1    | 587              | C/G | tgtaagtagattggctctgga | cttcgcatggattatttcat    | C_2821000_10  |
| rs3181101            | CD28 intron 1    | 615              | C/G | idem rs3181100        | idem rs3181100          | C_27469464_10 |
| rs1181390            | CD28 intron 1    | 1258             | G/T | aaattaactcggaaaatcac  | ctctgtactgccaaaataaga   | C_8806607_10  |
| rs1181388            | CD28 intron 1    | 4532             | G/A | tgggtggtttgtgactg     | taagggagcagctcaaagta    | C_2821002_10  |
| rs17533594           | CD28 intron 1    | 9776             | A/G | cttatggcccagctaaatg   | ttcctacacaggcagacacta   | C_32900233_10 |
| rs3116494            | CD28 intron 2    | 20602            | A/G | ctgacattgagcgggagagta | ttcctgagcttaacccattagac | C_27464981_10 |
| rs3181107            | CD28 intron 2    | 22307            | A/G | cctagtccagccctgaga    | gaatcaaaaggggatgagaag   | C_27467173_10 |
| rs3116496 (IVS3 +17) | CD28 intron 3    | 23093            | T/C | gtggagtctggcttgc      | aatgcctctgggaaatctaa    | C_25922478_10 |
| rs16840252           | CTLA4 promotor   | -1147            | C/T | gaggcatttggtagtatt    | agacaggaccaatgatctaac   | C_32900355_10 |
| rs5742909 (CT44)     | CTLA4 promotor   | -319             | C/T | caagggctcagaaagttag   | gaagccgtgggttag         | C_27834180_10 |
| rs231775 (CT42)      | CTLA4 exon 1     | 49               | A/G | gaacaccgctcccataaag   | gccagccaagccagatt       | C_2415786_20  |
| rs231777             | CTLA4 intron 1   | 923              | C/T | tacacggcttaaaatgatgag | cactaaatgcggtcacactc    | C_2415784_10  |
| rs3087243 (CT60)     | CTLA4 3'         | 6254             | G/A | tcagtatctggtggagtct   | caactgtaatgcctgtgat     | C_3296043_10  |
| rs11571319 (CT61)    | CTLA4 3'         | 6273             | G/A | idem rs3087243        | idem rs3087243          | C_30981401_10 |
| rs11571302 (JO31)    | CTLA4 intergenic | 10269            | G/T | ccatccatcctccccaagt   | tttgcgatcatcccctgaat    | by design     |
| rs7665213 (JO30)     | CTLA4 intergenic | 10744            | G/A | ttttctcctgcttgcatt    | aaagggtctcacaggagagta   | by design     |
| rs11571297 (JO27)    | CTLA4 intergenic | 12338            | T/C | ctggtcagccgagattgtgat | ccccagcgattcagagtg      | C_3296036_10  |
| rs10932029 (+173)    | ICOS intron 1    | 231              | T/C | attacgcacccaaaagacagt | ctatggtgccctggacatt     | C_430013_10   |
| rs4335928            | ICOS intron 1    | 443              | T/C | idem rs10932029       | idem rs10932029         | C_26263275_10 |
| rs4675374            | ICOS intron 1    | 1041             | C/T | ctcttcacactgagccctat  | catacaccatctggcacag     | C_29934539_10 |
| rs7602383            | ICOS intron 1    | 4915             | A/G | tctctgtaaattggcatctca | aagttcatatcccagtttct    | C_29052409_10 |
| rs4521021            | ICOS intron 1    | 15038            | T/C | aatgggggaaaaatctg     | gagaacagggtgcagtctacat  | C_377746_10   |
| rs11571323           | ICOS intron 1    | 17307            | G/A | ctaataattttcccaacaat  | ctgcctcagcctctta        | C_30981464_10 |
| rs12466129           | ICOS intron 1    | 17444            | T/A | idem rs11571323       | idem rs11571323         | C_8166476_30  |
| rs10172036           | ICOS intron 4    | 22746            | G/T | aaggcaatggagaggggaaag | tcggcagtagcaaggcagtc    | C_26263283_10 |
| rs10183087           | ICOS 3'UTR       | 22787            | A/C | idem rs10172036       | idem rs10172036         | C_30421029_10 |
| rs10932036           | ICOS 3'UTR       | 23644            | A/T | gccaacagccactctca     | tgcagcttcaggctaatga     | C_30981471_10 |
